# Supplementary material for: Thioguanine-based DENV-2 NS2B/NS3 protease inhibitors: Virtual screening, synthesis, biological evaluation and molecular modelling
Source: PubMed Central journal article supplement (PMC6345492; doi:10.1371/journal.pone.0210869), 2019-01-24
Supplement: pone.0210869.s002.pdf [file pone.0210869.s002.pdf]

## Supporting Information

### **Thioguanine-based DENV-2 NS2B/NS3 protease inhibitors: Virtual screening, synthesis, biological evaluation and molecular modelling**

Maywan Hariono<sup>1,2¶</sup>, Sy Bing Choi<sup>1,9&</sup>, Ros Fatimah Roslim<sup>1&</sup>, Mohamed Sufian Nawi<sup>1,3&</sup>, Mei Lan Tan<sup>4</sup>, Ezatul Ezleen Kamarulzaman<sup>1</sup>, Nornisah Mohamed<sup>1</sup>, Rohana Yusof<sup>5</sup>, Shatrath Othman<sup>6</sup>, Noorsaadah Abd Rahman<sup>6</sup>, Rozana Othman<sup>7</sup>, Habibah A. Wahab<sup>1,8\*</sup>

<sup>1</sup>School of Pharmaceutical Sciences, Universiti Sains Malaysia, Minden, Pulau Pinang, Malaysia

<sup>2</sup>Faculty of Pharmacy, Sanata Dharma University, Maguwoharjo, Sleman, Yogyakarta, Indonesia

<sup>3</sup>Department of Pharmaceutical Chemistry, Kulliyah of Pharmacy, International Islamic University Malaysia, Kuantan, Pahang, Malaysia

<sup>4</sup>Advanced Medical and Dental Institute, Universiti Sains Malaysia, Bertam, Pulau Pinang, Malaysia

<sup>5</sup>Department of Molecular Medicine, Faculty of Medicine, Universiti Malaya, Kuala Lumpur, Malaysia

<sup>6</sup>Department of Chemistry, Faculty of Science, Universiti Malaya, Kuala Lumpur, Malaysia

<sup>7</sup>Department of Pharmacy, Faculty of Medicine, Universiti Malaya, Kuala Lumpur, Malaysia

<sup>8</sup>Malaysian Institute of Pharmaceuticals and Nutraceuticals, Ministry of Science, Technology and Innovation, Halaman Bukit Gambir, Bayan Lepas, Pulau Pinang, Malaysia

<sup>9</sup>School of Data Sciences, Perdana University, Blok B and d1, MAEPS Building, MARDI Complex, Jalan MAEPS Perdana, 43400 Serdang, Selangor

\*Corresponding Author

E-mail: [habibahw@usm.my](mailto:habibahw@usm.my) ; [bibwahab@gmail.com](mailto:bibwahab@gmail.com)

&These authors contributed equally to this work

**S1 Fig**

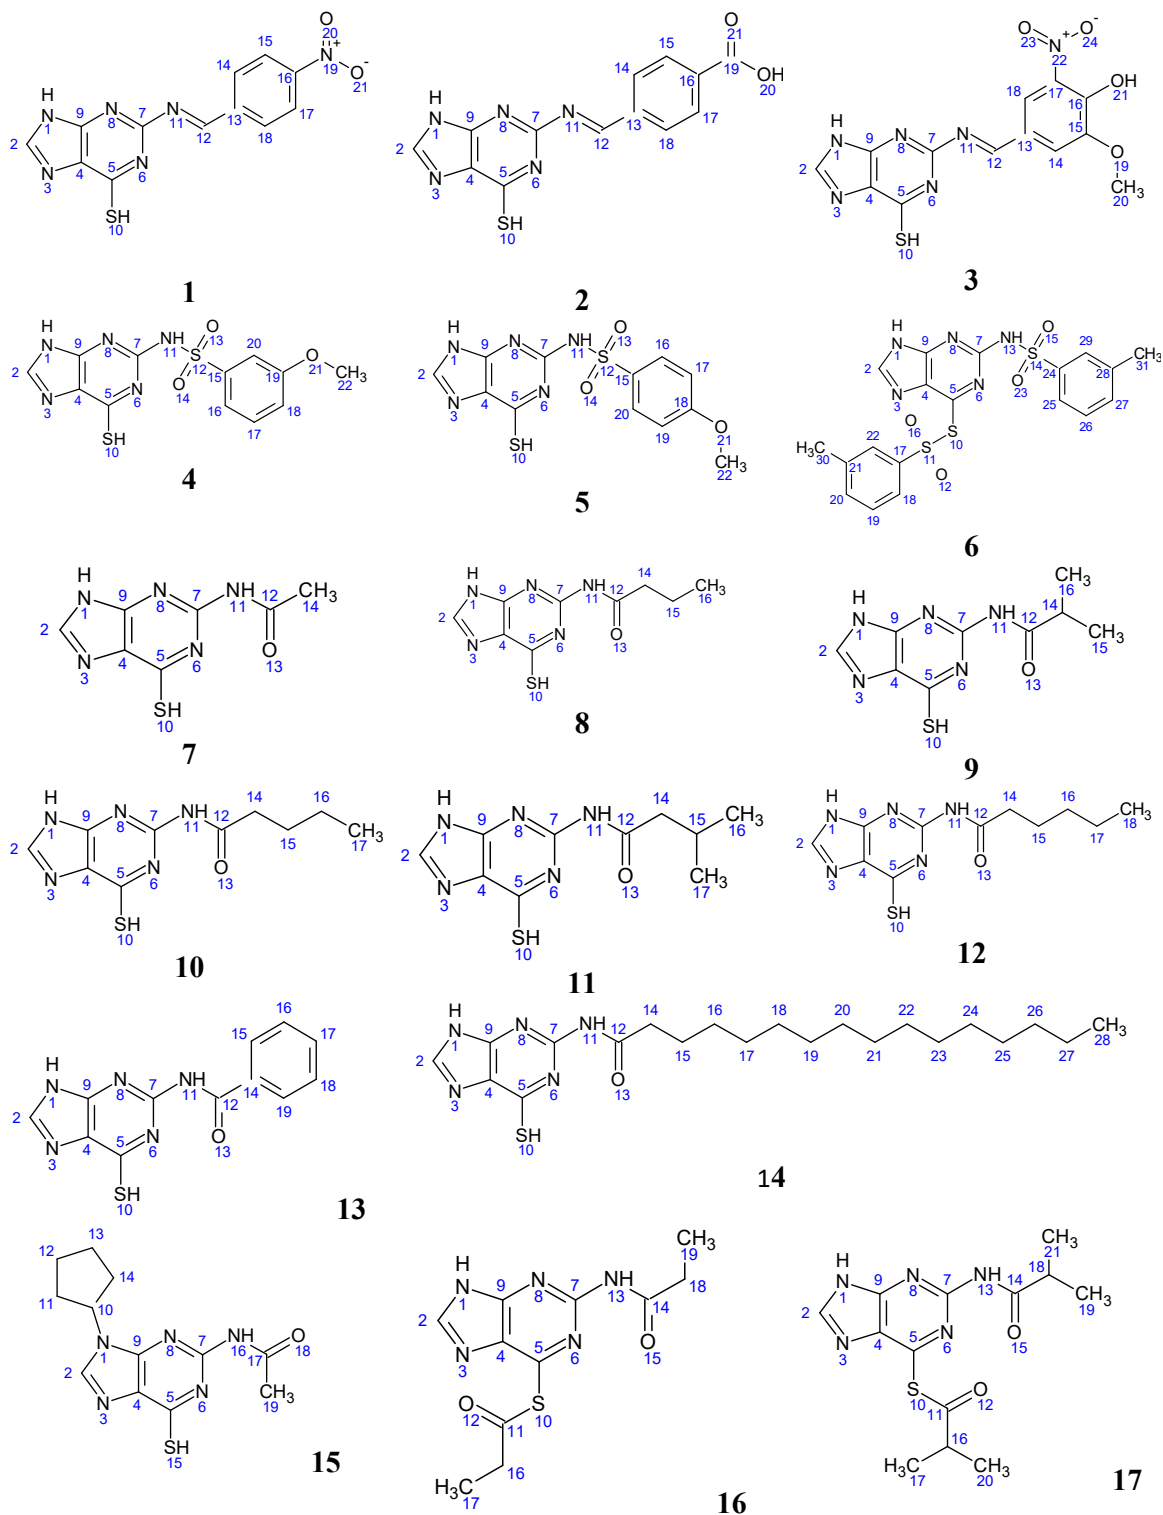

**S1 Fig. Continue.**

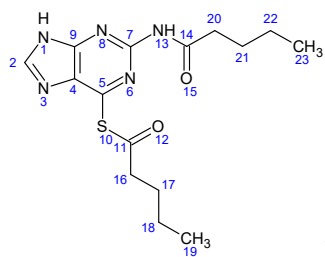

**18**

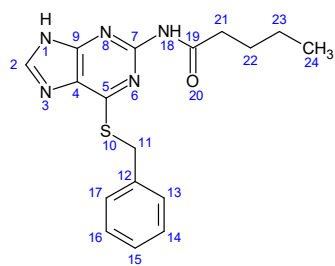

**19**

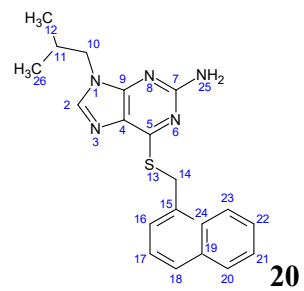

**20**

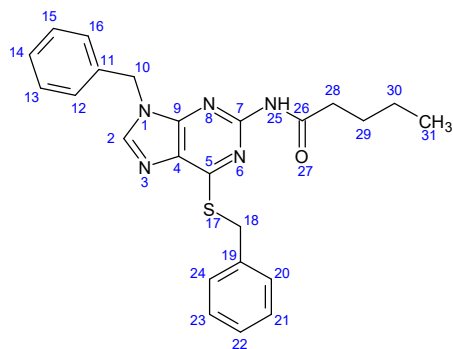

**21**
