# Supplementary material for: Thioguanine-based DENV-2 NS2B/NS3 protease inhibitors: Virtual screening, synthesis, biological evaluation and molecular modelling
Source: PubMed Central journal article supplement (PMC6345492; doi:10.1371/journal.pone.0210869), 2019-01-24
Supplement: pone.0210869.s004.pdf [file pone.0210869.s004.pdf]

## Supporting Information

### **Thioguanine-based DENV-2 NS2B/NS3 protease inhibitors: Virtual screening, synthesis, biological evaluation and molecular modelling**

Maywan Hariono<sup>1,2¶</sup>, Sy Bing Choi<sup>1,9&</sup>, Ros Fatimah Roslim<sup>1&</sup>, Mohamed Sufian Nawi<sup>1,3&</sup>, Mei Lan Tan<sup>4</sup>, Ezatul Ezleen Kamarulzaman<sup>1</sup>, Nornisah Mohamed<sup>1</sup>, Rohana Yusof<sup>5</sup>, Shatrath Othman<sup>6</sup>, Noorsaadah Abd Rahman<sup>6</sup>, Rozana Othman<sup>7</sup>, Habibah A. Wahab<sup>1,8\*</sup>

<sup>1</sup>School of Pharmaceutical Sciences, Universiti Sains Malaysia, Minden, Pulau Pinang, Malaysia

<sup>2</sup>Faculty of Pharmacy, Sanata Dharma University, Maguwoharjo, Sleman, Yogyakarta, Indonesia

<sup>3</sup>Department of Pharmaceutical Chemistry, Kulliyah of Pharmacy, International Islamic University Malaysia, Kuantan, Pahang, Malaysia

<sup>4</sup>Advanced Medical and Dental Institute, Universiti Sains Malaysia, Bertam, Pulau Pinang, Malaysia

<sup>5</sup>Department of Molecular Medicine, Faculty of Medicine, Universiti Malaya, Kuala Lumpur, Malaysia

<sup>6</sup>Department of Chemistry, Faculty of Science, Universiti Malaya, Kuala Lumpur, Malaysia

<sup>7</sup>Department of Pharmacy, Faculty of Medicine, Universiti Malaya, Kuala Lumpur, Malaysia

<sup>8</sup>Malaysian Institute of Pharmaceuticals and Nutraceuticals, Ministry of Science, Technology and Innovation, Halaman Bukit Gambir, Bayan Lepas, Pulau Pinang, Malaysia

<sup>9</sup>School of Data Sciences, Perdana University, Blok B and d1, MAEPS Building, MARDI Complex, Jalan MAEPS Perdana, 43400 Serdang, Selangor

\* Corresponding Author

E-mail: [habibahw@usm.my](mailto:habibahw@usm.my) ; [bibwahab@gmail.com](mailto:bibwahab@gmail.com)

&These authors contributed equally to this work

S1 Table

| Compounds           | Structures                                                                          | $\Delta G_{\text{bind}}$ (kcal/mol) |
|---------------------|-------------------------------------------------------------------------------------|-------------------------------------|
| NSC11668<br>(D0126) | 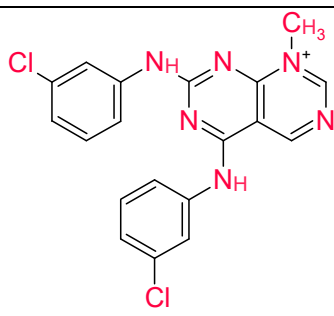   | -7.9                                |
| NSC13316<br>(D0152) |    | -6.8                                |
| NSC13480            |   | -7.8                                |
| NSC17474<br>(D0227) |  | -6.9                                |
| NSC19976<br>(D0265) |  | -6.5                                |

|                     |                                                                                     |      |
|---------------------|-------------------------------------------------------------------------------------|------|
| NSC37881            | 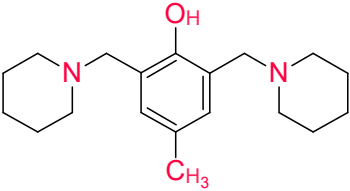   | -5.8 |
| NSC54278            |    | -7.6 |
| NSC54970            |    | -3.9 |
| NSC56452<br>(D0685) |  | -7.3 |
| NSC59486<br>(D0713) |  | -7.1 |
| NSC116977           |  | -7.1 |

|           |                                                                                      |      |
|-----------|--------------------------------------------------------------------------------------|------|
| NSC99504  | 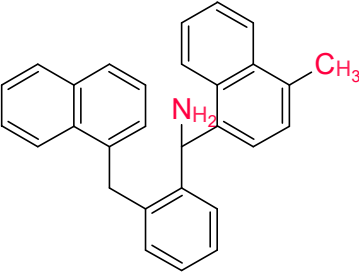    | -7.6 |
| NSC118208 |    | -7.0 |
| NSC122140 |    | -7.2 |
| NSC47704  |  | -7.0 |
| NSC34924  |   | -6.6 |

|                                     |                                                                                      |             |
|-------------------------------------|--------------------------------------------------------------------------------------|-------------|
| <p>NSC170561<br/><b>(D1498)</b></p> | 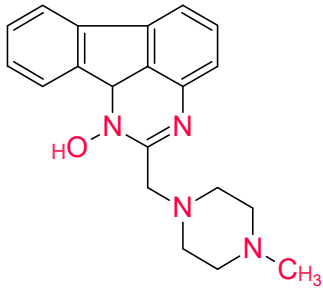    | <p>-7.4</p> |
| <p>NSC211322</p>                    |     | <p>-5.3</p> |
| <p>NSC48874</p>                     |    | <p>-7.3</p> |
| <p>NSC350625<br/><b>(D1804)</b></p> |  | <p>-7.3</p> |
| <p>NSC371872</p>                    |   | <p>-8.4</p> |

|                              |                                                                                    |             |
|------------------------------|------------------------------------------------------------------------------------|-------------|
| <p>NSC371876<br/>(D1853)</p> | 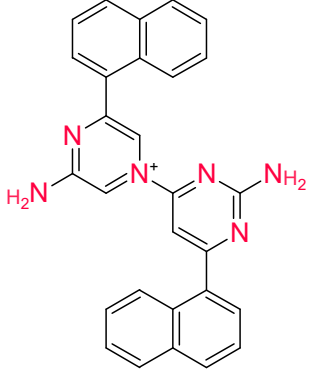  | <p>-9.9</p> |
| <p>NSC371880<br/>(D1855)</p> |  | <p>-8.9</p> |
| <p>NSC372037</p>             |  | <p>-8.3</p> |
